# Supplementary material for: Cancer Moonshot Immuno-Oncology Translational Network (IOTN): accelerating the clinical translation of basic discoveries for improving immunotherapy and immunoprevention of cancer
Source: PubMed Central journal article supplement (PMC7304845; doi:10.1136/jitc-2020-000796), 2020-06-17
Supplement: jitc-2020-000796supp001.pdf [file jitc-2020-000796supp001.pdf]

Table S1. The current IOTN awards.

| <b>Project Number</b> | <b>Project Title</b>                                                                                                                                                          | <b>Award Organization</b>                                                                              | <b>PIs</b><br>(Lead PI in bold)                                    |
|-----------------------|-------------------------------------------------------------------------------------------------------------------------------------------------------------------------------|--------------------------------------------------------------------------------------------------------|--------------------------------------------------------------------|
| UG3CA244697           | Intercepting Progression from Pre-invasive to Invasive Lung Adenocarcinoma                                                                                                    | Weill Medical College of Cornell University                                                            | <b>N.K. Altorki</b> , A. Borczuk, O.Elemento, T. Mcgraw, V. Mittal |
| U01CA233097           | Epithelium-Derived Alarmins Role in Breast Cancer Immunoprevention                                                                                                            | Massachusetts General Hospital                                                                         | <b>S. Demehri</b>                                                  |
| UG3CA244687           | Recurrent Tumor-specific Alternately Processed Transcripts as a Source of Neoantigens for NF1-associated Malignant Peripheral Nerve Sheath Tumor Immunoprevention             | University of Minnesota                                                                                | <b>D. Largaespada</b>                                              |
| U01DE029255           | Robust Immuno-prevention Strategies for High-risk Oral Epithelial Dysplasia                                                                                                   | University of Michigan                                                                                 | <b>Y. L. Lei</b> , J.C. Brenner, N. Neamati                        |
| U01CA233056           | Neoantigen Vaccination for Lynch Syndrome Immunoprevention                                                                                                                    | Weill Medical College of Cornell University / MD Anderson Cancer Center                                | <b>S. Lipkin</b> , E. Vilar-Sanchez                                |
| U01CA244452           | Mechanisms of Exosome Driven Immunoregulation of Cancer Progression                                                                                                           | University of California, San Francisco                                                                | <b>R. Blleloch</b> , L. Fong                                       |
| U01CA239258           | Enhancing Cell Therapy for Brain Tumors                                                                                                                                       | Children's Research Institute / Johns Hopkins University / University of North Carolina at Chapel Hill | <b>C. Bollard</b> , C.R. Cruz, R. Jones, B. Savoldo                |
| U01CA233096           | Cytokine Immunotherapies for Melanoma                                                                                                                                         | Yale University                                                                                        | <b>M. Bosenberg</b> , A. Ring                                      |
| U01CA232758           | B Cell-Dependent Anti-Tumor Immunity in Ovarian Cancer                                                                                                                        | H. Lee Moffitt Cancer Center & Research Institute                                                      | <b>J. Conejo-Garcia</b>                                            |
| U01CA233078           | N-Glycosylation and Immunotherapy for Cancer                                                                                                                                  | University of California, Irvine                                                                       | <b>M. Demetriou</b>                                                |
| U01CA244314           | Human CD3epsilon Co-potential to Boost Immunotherapy                                                                                                                          | University of Missouri-Columbia                                                                        | <b>D. Gil Pagés</b>                                                |
| U01CA244291           | Optimizing Myeloma-specific Immunity After Autologous Stem Cell Transplantation                                                                                               | Fred Hutchinson Cancer Research Center                                                                 | <b>G. Hill</b>                                                     |
| U01AA027681           | Immunosuppressive Mechanisms Responsible for Development of Non-Viral Liver Cancer and Control of its Response to Immune Checkpoint Inhibitors                                | University of California, San Diego / University of Southern California                                | <b>M. Karin</b> , A. El-Khoueiry, S. Shalapour, H. Tsukamoto       |
| U01CA233084           | MUC1-C is a Target for Reversing Immune Evasion and Resistance to Immunotherapies                                                                                             | Dana-Farber Cancer Institute / New York University                                                     | <b>D. Kufe</b> , K.K. Wong                                         |
| U01CA233102           | Immunomodulation of the Tumor Microenvironment with Molecular Targeted Radiotherapy to Facilitate an Adaptive Anti-Tumor Immune Response to Combined Modality Immunotherapies | University of Wisconsin – Madison                                                                      | <b>Z. Morris</b> , J. Weichert                                     |
| U01CA233085           | Reprogramming the Tumor Microenvironment to Overcome Multiple Primary and Acquired Immune                                                                                     | Roswell Park Comprehensive Cancer                                                                      | <b>K. Odunsi</b> , A. Gambotto, D.B. Kozbor                        |

|             |                                                                                                                                    |                                                                                     |                                                        |
|-------------|------------------------------------------------------------------------------------------------------------------------------------|-------------------------------------------------------------------------------------|--------------------------------------------------------|
|             | Resistance Mechanisms in Ovarian Cancer                                                                                            | Center / University of Pittsburgh                                                   |                                                        |
| U01DE028227 | Stimulating Neo-Antigen Specific T Cell Responses in Head and Neck Cancers                                                         | La Jolla Institute for Allergy and Immunology / University of California, San Diego | <b>S. Schoenberger</b> , J.S. Gutkind, A. Rao          |
| U01DE028233 | Targeting the Immunosuppressive Tumor Microenvironment to Enhance Efficacy of Radiotherapy and Immuno-Radiotherapy for Oral Cancer | Baylor College of Medicine                                                          | <b>A. Sikora</b> , A. Annapragada                      |
| U01DE029188 | Defining Mechanisms of Immunotherapy Resistance in Head and Neck Squamous Cell Carcinomas                                          | Dana-Farber Cancer Institute                                                        | <b>R. Uppaluri</b> , D. Barbie, R. Haddad              |
| U01CA233100 | Molecular and Immune Drivers of Immunotherapy Responsiveness in Prostate Cancer                                                    | Dana-Farber Cancer Institute / University of California, San Francisco              | <b>E. Van Allen</b> , L. Fong                          |
| U01CA233074 | Targeting Alternative Splicing for TCR Discovery in Small Cell Carcinomas                                                          | University of California, Los Angeles / Children's Hospital of Philadelphia         | <b>O. Witte</b> , G. Crooks, Y. Xing                   |
| U54CA244719 | Nano-immuno-oncology Approaches to Overcome Tumor Immune Evasion                                                                   | University of Texas Southwestern Medical Center                                     | <b>J. Gao</b> , Z. Chen                                |
| U54CA244711 | Engineering the Next Generation of T Cells                                                                                         | University of Pennsylvania                                                          | <b>C. June</b> , G. Linette, M. Milone                 |
| U54CA244438 | UCSF Center for Synthetic Immunology: Tools to Reprogram the Immune System to Combat Cancer                                        | University of California, San Francisco                                             | <b>W. Lim</b> , T. Desai, K. Roybal                    |
| U54CA244726 | Biomaterials to Create T Cell Immunity                                                                                             | Harvard University / Dana-Farber Cancer Institute                                   | <b>D. Mooney</b> , F. Hodi, D. Scadden, W. Shih, C. Wu |
| U01AR077511 | Identification of Pathways to Mitigate Immune-Related Adverse Events with Cancer Immunotherapy                                     | National Jewish Health / Memorial Sloan Kettering Cancer Center                     | <b>D.Y. Leung</b> , J.A. Kern, M. Lacouture            |
| U01CA247573 | Engineering Immunotherapeutic Probiotics to Mitigate irAEs                                                                         | Columbia University                                                                 | <b>T. Danino</b>                                       |
| U24CA232979 | IOTN: Data Management and Resource-Sharing Center                                                                                  | Roswell Park Comprehensive Cancer Center                                            | <b>A. Hutson</b> , S. Liu, M. Morgan, K. Odunsi        |
| U24CA233032 | IOTN: Cellular Immunotherapy Data Resource (CIDR)                                                                                  | Medical College of Wisconsin                                                        | <b>M. Pasquini</b>                                     |

Table S2. The IOTN initiatives.

| FOAs                            | IOTN Initiative                                                                         | Length of Initiative           | Goal                                                                                                                                                                                                                                          |
|---------------------------------|-----------------------------------------------------------------------------------------|--------------------------------|-----------------------------------------------------------------------------------------------------------------------------------------------------------------------------------------------------------------------------------------------|
| RFA-CA-17-045/<br>RFA-CA-19-015 | Cancer Immunotherapy Research Projects (U01)                                            | 5 years                        | Improve cancer treatment with immune-based approaches by enhancing our understanding of factors that contribute to immunosuppression, including within the immune cells, tumor cells, or tumor microenvironments.                             |
| RFA-CA-17-046/<br>RFA-CA-19-014 | Cancer Immunoprevention Research Projects (U01)                                         | 5 years                        | Identify the earliest exploitable changes in the carcinogenic process and develop preclinical immune-based interventions for prevent the development of cancers.                                                                              |
| RFA-CA-17-047                   | Data Management and Resource-Sharing Center (DMRC) (U24)                                | 5 years                        | Provide overall support, and facilitate collaboration, data management, and data sharing among the IOTN-funded components, as well as promote scientific outreach with other Cancer Moonshot initiatives and the larger scientific community. |
| RFA-CA-17-048                   | Cellular Immunotherapy Data Resource (CIDR) (U24)                                       | 5 years                        | Support a data registry for collecting outcomes of patients receiving cellular immunotherapies, that could be utilized for observational studies or inform subsequent pre-clinical studies and clinical trials.                               |
| RFA-CA-19-012                   | Cancer Immunoprevention Research Projects (UG3/UH3)                                     | UG3 - 2 years<br>UH3 - 3 years | Perform exploratory studies aimed at immune target identification and validation, followed by the development and preclinical testing of specific immunoprevention interventions.                                                             |
| RFA-CA-19-013                   | Immuno-engineering to Improve Immunotherapy (i3) Centers (U54)                          | 5 years                        | Incorporate innovative engineering solutions to accelerate the preclinical development of immunotherapeutic and immunopreventive interventions that are more effective, safer, and that could benefit a wider patient population.             |
| RFA-CA-19-044                   | Advancing Cancer Immunotherapy by Mitigating Immune-Related Adverse Events (irAE) (U01) | 5 years                        | Establish a deeper understanding of the origins and activation pathways leading to inflammatory or autoimmune adverse events that currently limit the use of various immunotherapy regimens in patients.                                      |
